# Supplementary material for: A DFT study of the second-order nonlinear optical properties of Ru(ii) polypyridine complexes
Source: Royal Society of Chemistry journal article supplement (doi:10.1039/d2cp00941b), 2022-01-01
Supplement: d2cp00941b1.pdf [file d2cp00941b1.pdf]

## Supporting Information

### A DFT study on second-order nonlinear optical properties of Ru (II) polypyridine complexes

Yu Chen, Yuan Zhang, Yang Shen, Yuanyuan Zhao,<sup>1</sup> and Yong-Qing Qiu<sup>2</sup>

*Institute of Functional Material Chemistry, Faculty of Chemistry, Northeast Normal University,  
Changchun, 130024, China*

---

<sup>1</sup> Corresponding Author. Fax: +86043185099291  
E-mail addresses: [yuanyuan-zhao@outlook.com](mailto:yuanyuan-zhao@outlook.com) (Y. Y. Zhao)  
<sup>2</sup> Corresponding Author. Fax: +86043185098768.  
E-mail addresses: [qiuyq466@nenu.edu.cn](mailto:qiuyq466@nenu.edu.cn) (Y. Q. Qiu)

## General Comments

**Fig. S1.** Polarizabilities  $\alpha$  (a.u.) of all studied complexes calculated by four functionals with 6-31+G(d) basis set.

**Fig. S2.** Total first hyperpolarizabilities  $\beta_{\text{tot}}$  (a.u.) of all studied complexes calculated by four functionals with 6-31+G(d) basis set.

**Fig. S3.** Plots of  $-\gamma\rho_{yy}^{(2)}$  for the neutral complexes **1-10** (yellow color represents positive value, pink color represents negative value, respectively).

**Fig. S4.** Natural transition orbitals diagrams of complexes 1-10 obtained at the B3LYP/6-31+G(d) level of theory. Red and blue parts correspond to electron depletion and accumulation, respectively.

**Table S1** Selected bond lengths (Å) and bond angles (°) of all studied complexes obtained at the PBE1PBE/6-31G(d)/SDD level.

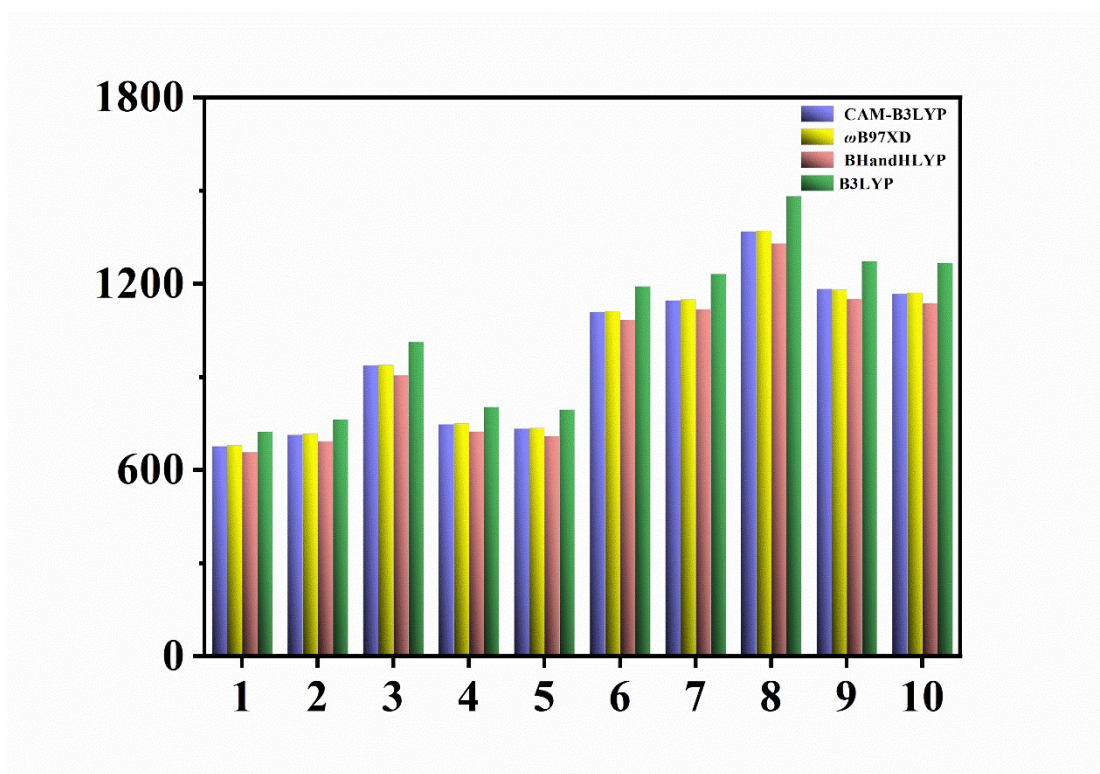

**Fig. S1** Polarizabilities  $\alpha$  (a.u.) of all studied complexes calculated by four functionals with 6-31+G(d) basis set

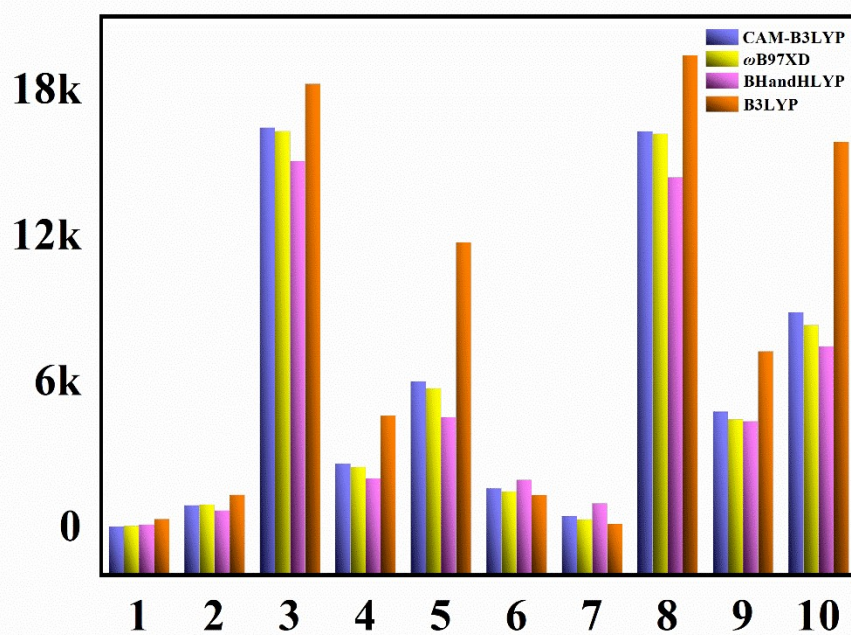

**Fig. S2** Total first hyperpolarizabilities  $\beta_{\text{tot}}$  (a.u.) of all studied complexes calculated by four functionals with 6-31+G(d) basis set

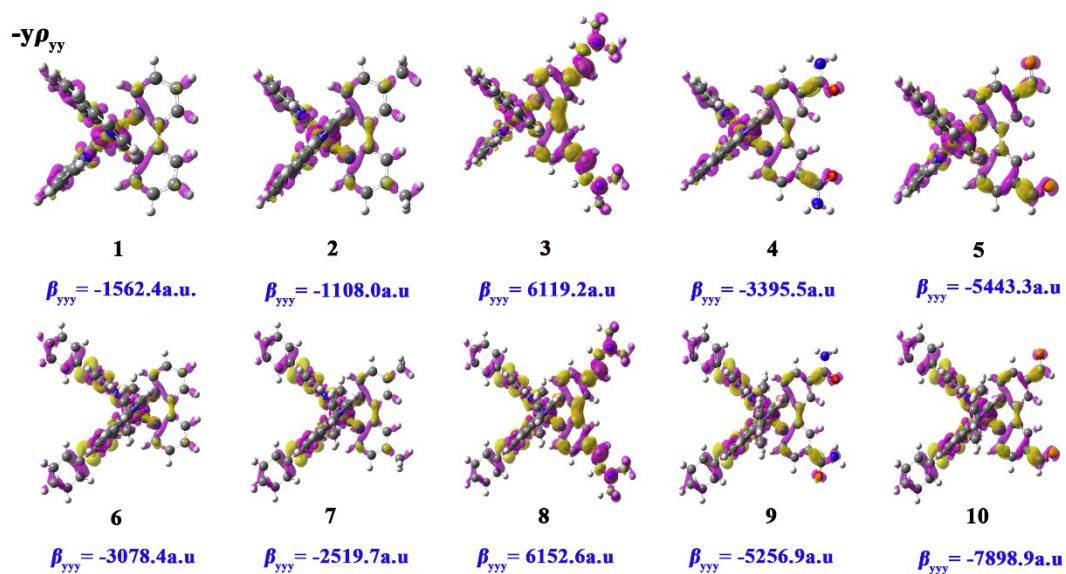

**Figure S3** Plots of  $-y\rho_{yy}^{(2)}$  for the neutral complexes **1-10** (yellow color represents positive value, pink color represents negative value, respectively).

| Transition 1                                                 |                                                                                     | Transition 2                                     |                                                                                      |
|--------------------------------------------------------------|-------------------------------------------------------------------------------------|--------------------------------------------------|--------------------------------------------------------------------------------------|
| <b>1</b><br>Weight:<br>$L'=0.101$<br>$Ru=0.737$<br>$L=0.162$ | 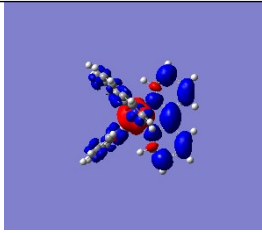   | Weight:<br>$L'=0.023$<br>$Ru=0.061$<br>$L=0.917$ |    |
| <b>2</b><br>Weight:<br>$L'=0.110$<br>$Ru=0.729$<br>$L=0.161$ |    | Weight:<br>$L'=0.021$<br>$Ru=0.132$<br>$L=0.846$ |    |
| <b>3</b><br>Weight:<br>$L'=0.615$<br>$Ru=0.321$<br>$L=0.065$ |   | Weight:<br>$L'=0.072$<br>$Ru=0.264$<br>$L=0.663$ |   |
| <b>4</b><br>Weight:<br>$L'=0.124$<br>$Ru=0.730$<br>$L=0.146$ |  | Weight:<br>$L'=0.065$<br>$Ru=0.085$<br>$L=0.850$ |  |
| <b>5</b><br>Weight:<br>$L'=0.057$<br>$Ru=0.688$<br>$L=0.255$ |  | Weight:<br>$L'=0.197$<br>$Ru=0.102$<br>$L=0.702$ |  |
| <b>6</b><br>Weight:<br>$L'=0.063$<br>$Ru=0.759$<br>$L=0.178$ |  | Weight:<br>$L'=0.034$<br>$Ru=0.028$<br>$L=0.945$ |  |
| <b>7</b><br>Weight:<br>$L'=0.076$<br>$Ru=0.750$<br>$L=0.174$ |  | Weight:<br>$L'=0.212$<br>$Ru=0.499$<br>$L=0.288$ |  |

|                                                  |                                                                                   |                                            |                                                                                    |
|--------------------------------------------------|-----------------------------------------------------------------------------------|--------------------------------------------|------------------------------------------------------------------------------------|
| 8<br>Weight:<br>L'=0.504<br>Ru=0.388<br>L=0.107  | 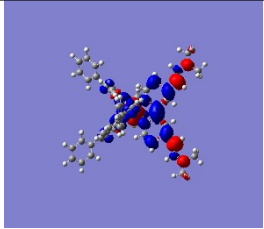 | Weight:<br>L'=0.704<br>Ru=0.252<br>L=0.044 |  |
| 9<br>Weight:<br>L'=0.096<br>Ru=0.682<br>L=0.223  |  | Weight:<br>L'=0.020<br>Ru=0.105<br>L=0.876 |  |
| 10<br>Weight:<br>L'=0.059<br>Ru=0.606<br>L=0.335 |  | Weight:<br>L'=0.025<br>Ru=0.218<br>L=0.757 |  |

**Fig. S4.** Natural transition orbitals diagrams of complexes 1-10 obtained at the B3LYP/6-31+G(d) level of theory. Red and blue parts correspond to electron depletion and accumulation, respectively.

**Computational detail:**

“The magnitude of charge transfer( $q^{CT}$ ) is calculated as,

$$q^{CT} = \int \rho_+(r)dr = \int \rho_-(r)dr$$

Where  $\rho_+$  and  $\rho_-$  represent an increase and a decrease of the density in space resulting from the electronic transition.

And the length of charge shift ( $d^{CT}$ ) is thus defined as the distance separating between the starting and ending points of transfer,

$$d^{CT} = |r_+ - r_-|$$

where  $r_+$  and  $r_-$  are defined as

$$r_+ = (x_+, y_+, z_+) = \frac{1}{q^{CT}} \int r \rho_+(r)dr$$

$$r_- = (x_-, y_-, z_-) = \frac{1}{q^{CT}} \int r \rho_-(r)dr$$



**Table S1** Selected bond lengths (Å) and bond angles (°) of all studied complexes obtained at the PBE1PBE/6-31G(d)/SDD level.

| <b>Complex</b>             | Ru-N <sub>1</sub> | Ru-N <sub>2</sub> | Ru-N <sub>3</sub> | Ru-N <sub>4</sub> | Ru-N <sub>5</sub> | Ru-N <sub>6</sub> | ∠N <sub>5</sub> -<br>Ru-N <sub>6</sub> | ∠N <sub>3</sub> -<br>Ru-N <sub>4</sub> | Δr <sub>Ru-N</sub> |
|----------------------------|-------------------|-------------------|-------------------|-------------------|-------------------|-------------------|----------------------------------------|----------------------------------------|--------------------|
| <b>1<sup>a</sup></b>       | 2.071             | 2.054             | 2.073             | 2.069             | 2.065             | 2.058             | 78.6                                   | 80.0                                   |                    |
| <b>1<sup>PBE1PBE</sup></b> | 2.086             | 2.082             | 2.086             | 2.083             | 2.073             | 2.073             | 78.4                                   | 79.3                                   | 0.013              |
| <b>1<sup>B3LYP</sup></b>   | 2.115             | 2.111             | 2.115             | 2.115             | 2.101             | 2.101             | 78.8                                   | 78.8                                   | 0.023              |
| <b>1<sup>ωB97XD</sup></b>  | 2.107             | 2.100             | 2.107             | 2.100             | 2.090             | 2.090             | 78.2                                   | 79.0                                   | 0.034              |
| <b>2<sup>a</sup></b>       | 2.072             | 2.070             | 2.060             | 2.078             | 2.062             | 2.058             | 78.8                                   | 79.5                                   |                    |
| <b>2</b>                   | 2.082             | 2.085             | 2.085             | 2.081             | 2.074             | 2.074             | 78.2                                   | 79.3                                   |                    |
| <b>3</b>                   | 2.075             | 2.084             | 2.084             | 2.075             | 2.074             | 2.074             | 78.0                                   | 79.3                                   |                    |
| <b>4</b>                   | 2.073             | 2.073             | 2.077             | 2.077             | 2.077             | 2.077             | 78.6                                   | 79.2                                   |                    |
| <b>5</b>                   | 2.086             | 2.088             | 2.087             | 2.085             | 2.067             | 2.068             | 79.2                                   | 78.7                                   |                    |
| <b>6</b>                   | 2.075             | 2.075             | 2.071             | 2.076             | 2.076             | 2.071             | 78.4                                   | 78.8                                   |                    |
| <b>7</b>                   | 2.078             | 2.079             | 2.071             | 2.071             | 2.079             | 2.078             | 78.1                                   | 78.8                                   |                    |
| <b>8</b>                   | 2.083             | 2.086             | 2.086             | 2.083             | 2.071             | 2.072             | 78.8                                   | 78.8                                   |                    |
| <b>9</b>                   | 2.068             | 2.068             | 2.078             | 2.078             | 2.078             | 2.080             | 78.5                                   | 78.7                                   |                    |
| <b>10</b>                  | 2.081             | 2.080             | 2.080             | 2.080             | 2.063             | 2.064             | 78.7                                   | 78.7                                   |                    |

Note: The a denotes as the experimental values that are from Ref. 42.
